# Supplementary material
Source: PubMed Central journal article supplement (PMC4291297)
Supplement: NIHMS627817-supplement.pdf [file NIHMS627817-supplement.pdf]

**Supplementary Table 1.** mRNA transcripts evaluated by qPCR. The expression of each gene was normalized to  $\beta$ -actin, and then further normalized to the vehicle treated control group using the  $2^{-\Delta\Delta Ct}$  approach. P values for the unpaired t-test comparing muscles from simvastatin treated animals to vehicle treated animals are provided (N=8 supraspinatus muscles from each group).

| Gene     | P Value | RefSeq       | Name                                                       |
|----------|---------|--------------|------------------------------------------------------------|
| Acat1    | 0.04    | NM_017075    | Acetyl-coenzyme A acetyltransferase 1                      |
| Actb     | --      | NM_031144    | Actin, beta                                                |
| Agpat6   | 0.22    | NM_001047849 | 1-acylglycerol-3-phosphate O-acyltransferase 6, GPAT4      |
| Alox5    | 0.19    | NM_012822    | 5-LOX, Arachidonate 5-lipoxygenase                         |
| Apoe     | 0.06    | NM_138828    | Apolipoprotein E                                           |
| Atg16l1  | 0.47    | NM_001108809 | ATG16 autophagy related 16-like 1 ( <i>S. cerevisiae</i> ) |
| Atg5     | 0.40    | NM_001014250 | ATG5 autophagy related 5 homolog ( <i>S. cerevisiae</i> )  |
| Atgl     | 0.04    | NM_001108509 | Adipose Triglyceride Lipase                                |
| Becn1    | 0.14    | NM_053739    | Beclin 1, autophagy related                                |
| Cd11b    | 0.08    | NM_012711    | Integrin, alpha M                                          |
| Cd68     | 0.04    | NM_001031638 | Cd68 molecule                                              |
| Cebpa    | 0.01    | NM_012524    | CCAAT/enhancer binding protein (C/EBP), alpha              |
| Cgi58    | 0.12    | NM_212524    | Abhydrolase domain containing 5                            |
| Colla2   | 0.01    | NM_053356    | Collagen, type I, alpha 2                                  |
| Cox1     | 0.12    | NM_017043    | Prostaglandin-endoperoxide synthase 1                      |
| Cox2     | 0.12    | NM_017232    | Prostaglandin-endoperoxide synthase 2                      |
| Dgat1    | 0.50    | NM_053437    | Diacylglycerol O-acyltransferase homolog 1 (mouse)         |
| Emr1     | 0.27    | NM_001007557 | EGF-like module containing, F4/80                          |
| Fat/Cd36 | 0.05    | XM_575338    | Similar to fatty acid translocase/CD36                     |
| Fbxo32   | 0.20    | NM_133521    | Atrogin-1                                                  |
| Fitm1    | 0.11    | NM_001106037 | Fat storage-inducing transmembrane protein 1               |
| Fitm2    | 0.37    | NM_001107799 | Fat storage-inducing transmembrane protein 2               |
| Fsp1     | 0.10    | NM_012618    | S100 calcium-binding protein A4                            |
| Fsp27    | 0.08    | NM_001024333 | Cell death-inducing DFFA-like effector c, CIDEC            |
| Cd168    | 0.17    | NM_012964    | Hyaluronan mediated motility receptor (RHAMM)              |
| Il10     | 0.23    | NM_012854    | Interleukin 10                                             |
| Il1b     | 0.03    | NM_031512    | Interleukin 1 beta                                         |
| Il6      | 0.47    | NM_012589    | Interleukin 6                                              |
| Mmp2     | 0.01    | NM_031054    | Matrix metalloproteinase 2                                 |
| Mmp3     | 0.11    | NM_133523    | Matrix metalloproteinase 3                                 |
| Mmp8     | 0.18    | NM_022221    | Matrix metalloproteinase 8                                 |
| Mmp9     | 0.22    | NM_031055    | Matrix metalloproteinase 9                                 |
| Mmp13    | 0.18    | NM_133530    | Matrix metalloproteinase 13                                |
| Mmp14    | 0.01    | NM_031056    | Matrix metalloproteinase 14 (membrane-inserted)            |
| eMHC     | 0.03    | NM_012604    | Myosin, heavy chain 3, skeletal muscle, embryonic          |
| Pdgfra   | 0.04    | NM_012802    | Platelet derived growth factor receptor, alpha             |
| Pld1     | 0.07    | NM_030992    | Phospholipase D1                                           |
| Plin1    | 0.05    | NM_013094    | Perilipin 1                                                |
| Plin5    | 0.42    | NM_001134637 | Perilipin 5                                                |
| Pparg    | 0.03    | NM_013124    | Peroxisome proliferator-activated receptor gamma           |
| Scx      | 0.11    | NM_001130508 | Scleraxis                                                  |
| Timp1    | 0.01    | NM_053819    | TIMP metalloproteinase inhibitor 1                         |
| Timp2    | 0.02    | NM_021989    | TIMP metalloproteinase inhibitor 2                         |
| Tnmd     | 0.02    | NM_022290    | Tenomodulin                                                |
| Trim63   | 0.27    | NM_080903    | MuRF-1, Tripartite motif-containing 63                     |
| Vps34    | 0.11    | NM_022958    | Phosphoinositide-3-kinase, class 3                         |
